# Supplementary material for: Impaired neurite development and mitochondrial dysfunction associated with calcium accumulation in dopaminergic neurons differentiated from the dental pulp stem cells of a patient with metatropic dysplasia
Source: PubMed Central journal article supplement — Biochem Biophys Rep. 2021 Mar 9;26:100968. doi: 10.1016/j.bbrep.2021.100968 (PMC7960789; doi:10.1016/j.bbrep.2021.100968), 2021-03-09
Supplement: mmc1.pdf [file mmc1.pdf]

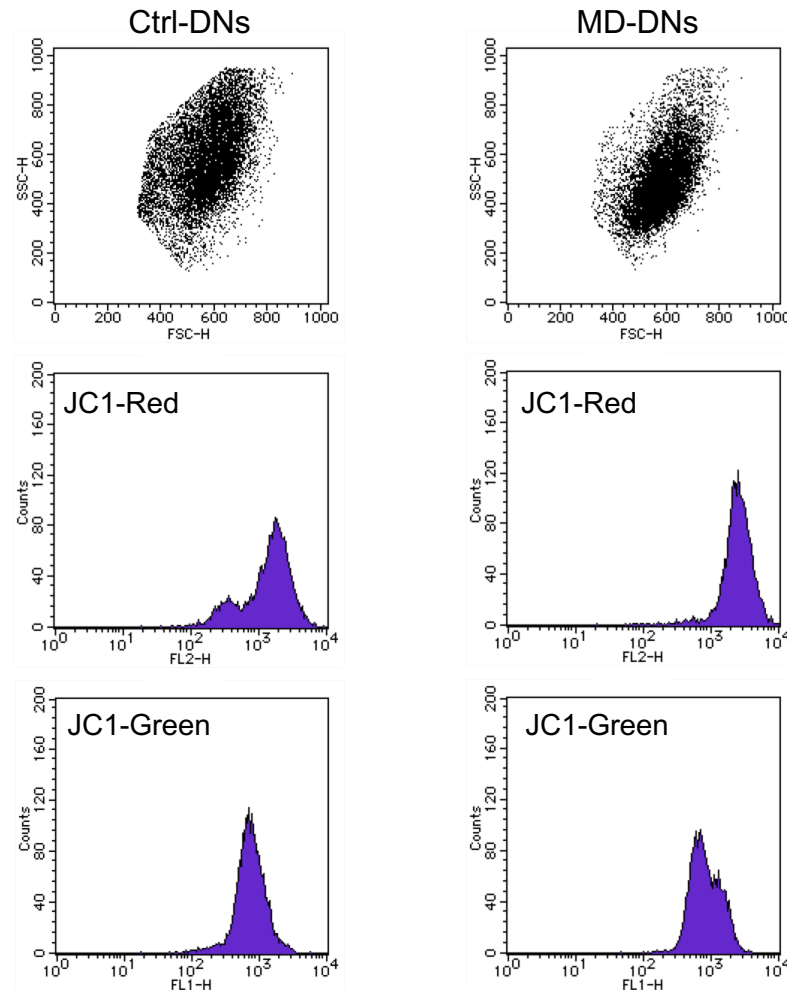

Supplementary Fig. S1. Mutant (metatropic dysplasia, MD) and control (Ctrl) dopaminergic neurons (DNs) were stained with JC-1 and analyzed by flow cytometry. The upper panels show the forward scatter (FSC) and side scatter (SSC). The middle and lower panels show JC-1 red and green histograms, respectively.
