# Supplementary material for: Impaired neurite development and mitochondrial dysfunction associated with calcium accumulation in dopaminergic neurons differentiated from the dental pulp stem cells of a patient with metatropic dysplasia
Source: PubMed Central journal article supplement — Biochem Biophys Rep. 2021 Mar 9;26:100968. doi: 10.1016/j.bbrep.2021.100968 (PMC7960789; doi:10.1016/j.bbrep.2021.100968), 2021-03-09
Supplement: mmc2.pdf [file mmc2.pdf]

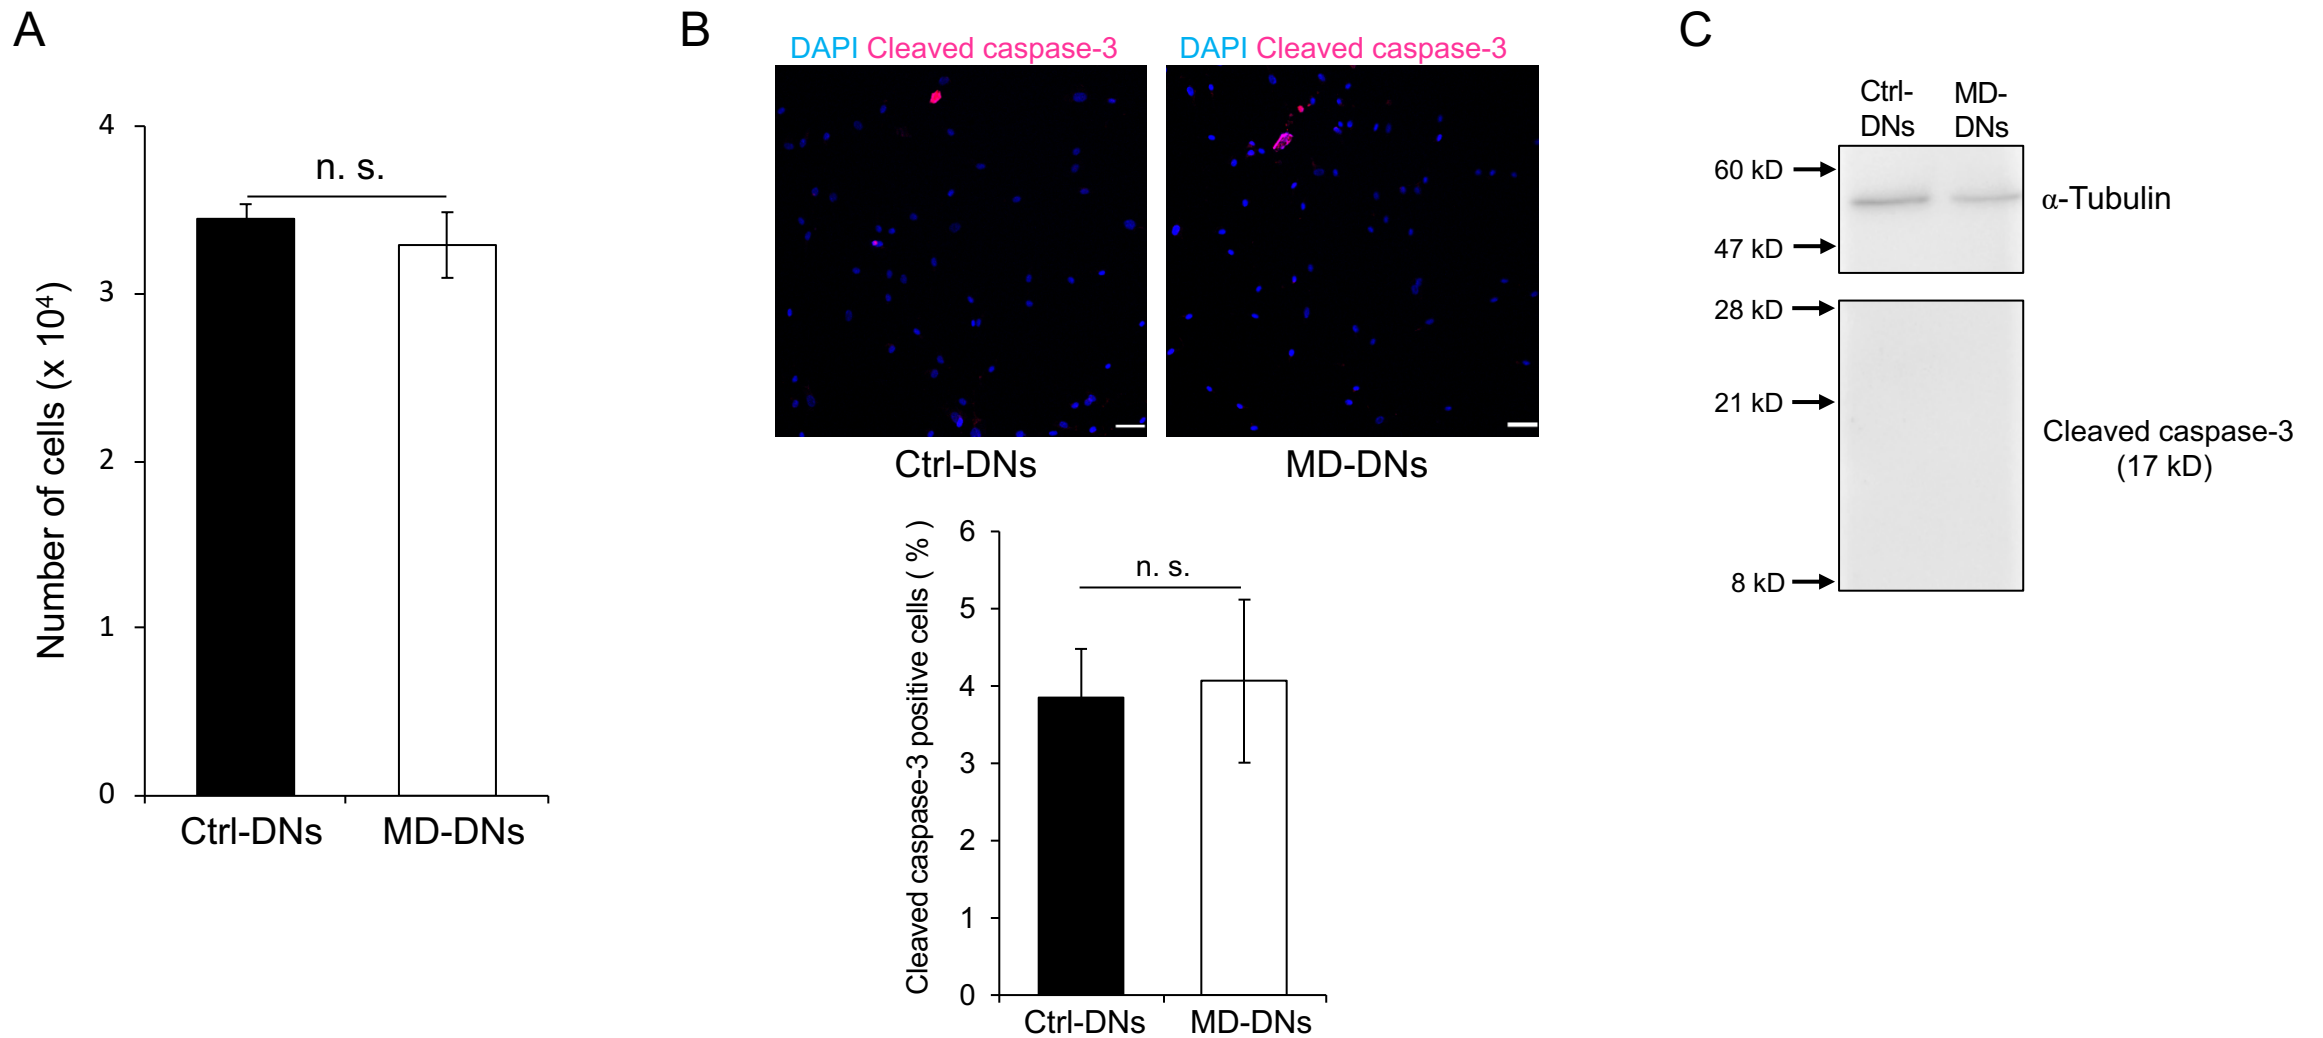

Supplementary Fig. S2. (A) After dopaminergic neuron (DN) differentiation, mutant (metatropic dysplasia, MD) and control (Ctrl) cells were stained with trypan blue and counted using a hemocytometer. Means  $\pm$  standard error of the means (SEMs) were obtained from three experiments. (B) DNns were immunostained with anti-cleaved caspase-3 antibodies (Cell Signaling Technology, MA, USA). Nuclei were counterstained with 4',6-diamidino-2-phenylindole (DAPI). Scale bars = 50  $\mu$ m. The cleaved caspase-3-positive cells were counted. Means  $\pm$  SEMs were obtained after analyzing 30 cells from three experiments. (C) The expression of cleaved caspase-3 and  $\alpha$ -Tubulin (internal control) in DNns. n.s., not significant.
